# Supplementary material for: Andy’s Algorithms: new automated digital image analysis pipelines for FIJI
Source: PubMed Central journal article supplement (PMC5691210; doi:10.1038/s41598-017-15885-6), 2017-11-16
Supplement: 41598_2017_15885_MOESM1_ESM.pdf [file 41598_2017_15885_MOESM1_ESM.pdf]

# **Andy's Algorithms: new automated digital image analysis pipelines for FIJI**

Andrew M.K Law<sup>1</sup>, Julia X.M Yin<sup>1</sup>, Lesley Castillo<sup>1</sup>, Adelaide I.J. Young<sup>1</sup>, Catherine Piggin<sup>1</sup>, Samuel Rogers<sup>1</sup>, Catherine Elizabeth Caldon<sup>1,2</sup>, Andrew Burgess<sup>1,2</sup>, Ewan K.A. Millar<sup>1,3,4,5</sup>, Sandra A. O'Toole<sup>1,6</sup>, David Gallego-Ortega<sup>1,2</sup>, Christopher J Ormandy<sup>1,2\*</sup>, and Samantha R Oakes<sup>1,2\*#</sup>

<sup>1</sup> Garvan Institute of Medical Research and the Kinghorn Cancer Centre, 384 Victoria Street, Darlinghurst, NSW 2010, Australia.

<sup>2</sup> St. Vincent's Clinical School, UNSW Sydney, Victoria Street, NSW 2052, Australia.

<sup>3</sup> Department of Anatomical Pathology, South Eastern Area Laboratory Service, St George Hospital, Grey St. Kogarah, 2217, Australia.

<sup>4</sup> School of Medical Sciences, UNSW Sydney, Kensington, NSW 2033, Australia.

<sup>5</sup> School of Medicine and Health Sciences, Sydney Western University, Campbelltown, NSW 2560, Australia.

<sup>6</sup> Australian Clinical Labs, 112/14 Lexington Drive, Bella Vista, NSW 2153, Australia.

\* Joint senior authors

# Corresponding author

Twitter @Sam\_R\_Oakes

Garvan Institute of Medical Research and the Kinghorn Cancer Centre. 384 Victoria Street, Darlinghurst, NSW 2010, Australia. Email: s.oakes@garvan.org.au

Telephone: 61 (2) 9355 5812 Facsimile: 61 (2) 9355 5872

Keywords: Image analysis, immunohistochemistry, 3,3'-diaminobenzidine, automated image quantification, proximity ligation assays, metastasis, intensity analysis, hematoxylin and eosin, 3D colony forming assays.

## **Supplementary Figure Legends**

### **Supplementary Figure 1. Flowchart illustrating the processes in Andy's DAB+ IHC Algorithm.**

A raw image is selected from the target folder and a color blindness filter (deuteranope filter for total selection or tritanope filter for DAB+ selection) is applied to enhance the selection of the region of interest (ROIs) selection prior to the application of a color deconvolution filter (Feulgen light green filter for total selection or a H&E for DAB+ selection) A Gaussian blur is then applied to the image, which is then converted to an 8-bit grey-scale image before applying a threshold. An optimal automatic threshold function is selected from five main algorithms; (Huang, RenyiEntropy (or Li for the basic pipeline), Otsu, Shanbhag, and Yen). The image is then converted to a binary image and watershed, fill holes, and edge exclusion can be applied before processing with particle exclusion. Image analysis is performed with overlay images of both the total and DAB+ selection produced in the target folder.

### **Supplementary Figure 2. A new pipeline for H&E image analysis**

(A) Flow chart depicting the image processing steps within the H&E particle algorithm for the selection of all hematoxylin (H) rich regions within an H&E image. A raw image is selected from the target folder and a color blindness filter (deuteranope filter for total tissue selection or tritanope filter for dark blue hematoxylin selection) is applied to enhance region of interest (ROIs) selection prior to the application of a color deconvolution filter (FastRed/Fastblue/DAB filter for total tissue selection or a H&E/DAB for dark blue hematoxylin selection) to discriminate between dark blue and light blue/red. A Gaussian blur is then applied to the image, which is then converted to an 8-bit grey-scale image before applying a

threshold. An optimal automatic threshold function is applied (using the calculations Moments, MaxEntropy, Otsu, Triangle (or Intermodes for the hematoxylin dense regions) and Yen for the selection). The image is then converted to a binary image and watershed, fill holes, and edge exclusion can be applied before processing with particle exclusion. Image analysis is performed with overlay images of both the total tissue and dark blue hematoxylin dense selection produced in the target folder. **(B)** Representative raw H&E image (left panel), the total selection overlay (middle panel) and the hematoxylin (H) dense regions (right panel).

**Supplementary Figure 3. A new pipeline for 3D colony particle analysis.**

**(A)** Flow chart depicting the image processing steps within Andy's 3D colony Algorithm for the image analysis of 3D colonies embedded in an extracellular matrix. Background is first removed from brightfield images of 3D colony forming assays. removing shadowing as a result of uneven illumination and shadowing effects (*e.g.* due to tissue culture wells in 3D colony forming assays, Supp. Fig. 3B). A Gaussian blur is then applied to the image, which is then converted to an 8-bit grey-scale image before applying a threshold. An optimal automatic threshold function is selected from five main algorithms; Huang, Li (or MaxEntropy for the normalize local contrast selection), Otsu, Triangle, and Yen). The image is then converted to a binary image and watershed, fill holes, and edge exclusion can be applied before processing with particle exclusion. Image analysis is performed with overlay images of both the total tissue and dark blue hematoxylin dense selection produced in the target folder.

**Supplementary Figure 4. Flowchart outlining Andy's PLA Algorithm used in the series analysis.** Raw image is identified within the folder and opened in FIJI. The

nuclei image is processed first, followed by the foci image, and finally by the cytoplasmic image. Nuclei and cytoplasmic images are processed with Enhanced Contrast and Remove Outliers before it is converted to an 8-bit grey scale image. A maxima selection with an adjustable noise tolerance is used to identify and select the signals in the foci image. A manual or automatic threshold is set (using the calculations Huang, Intermodos, Otsu and RenyiEntropy) for nuclei and cytoplasmic images are automatically then converted to a binary mask image. Mask conversion of foci image is based on maxima selection. Final selection is overlaid on top of the raw image and nuclei and cytoplasmic foci signals are differentiated. A more detailed explanation of the processes and additional steps are outlined within the tutorial of the PLA algorithm.

**Supplementary Table 1:** List of open access and commercial image processing and analysis programs, website and references.

| Name                                            | Website                                                                                                                                                                                                                                                                       | Reference |
|-------------------------------------------------|-------------------------------------------------------------------------------------------------------------------------------------------------------------------------------------------------------------------------------------------------------------------------------|-----------|
| <b>Open-Access Programs</b>                     |                                                                                                                                                                                                                                                                               |           |
| ImageJ                                          | <a href="https://imagej.nih.gov/ij/">https://imagej.nih.gov/ij/</a>                                                                                                                                                                                                           | 1         |
| FIJI                                            | <a href="https://fiji.sc/">https://fiji.sc/</a>                                                                                                                                                                                                                               | 2         |
| ImmunoRatio                                     | <a href="http://153.1.200.58:8080/immunoratio/">http://153.1.200.58:8080/immunoratio/</a>                                                                                                                                                                                     | 3         |
| CellProfiler                                    | <a href="http://cellprofiler.org">http://cellprofiler.org</a>                                                                                                                                                                                                                 | 4         |
| ilastik                                         | <a href="http://ilastik.org/">ilastik.org/</a>                                                                                                                                                                                                                                | 5         |
| Icy                                             | <a href="http://icy.bioimageanalysis.org/">icy.bioimageanalysis.org/</a>                                                                                                                                                                                                      | 6         |
| Daime                                           | <a href="http://dome.csb.univie.ac.at/daime">dome.csb.univie.ac.at/daime</a>                                                                                                                                                                                                  | 7         |
| BlobFinder                                      | <a href="http://www.cb.uu.se/~amin/BlobFinder/">www.cb.uu.se/~amin/BlobFinder/</a>                                                                                                                                                                                            | 8         |
| VIGRA<br>(Vision with<br>Generic<br>Algorithms) | <a href="https://ukoethe.github.io/vigra/">https://ukoethe.github.io/vigra/</a>                                                                                                                                                                                               |           |
| <b>Commercial Algorithms</b>                    |                                                                                                                                                                                                                                                                               |           |
| MATLAB                                          | <a href="https://www.mathworks.com/products/matlab.html">https://www.mathworks.com/products/matlab.html</a>                                                                                                                                                                   |           |
| MetaMorph                                       | <a href="https://www.moleculardevices.com/systems/metamorph-research-imaging/metamorph-microscopy-automation-and-image-analysis-software">https://www.moleculardevices.com/systems/metamorph-research-imaging/metamorph-microscopy-automation-and-image-analysis-software</a> |           |
| Duolink®<br>ImageTool                           | <a href="http://www.sigmaaldrich.com/catalog/product/sigma/duo90806?lang=en&amp;region=AU">http://www.sigmaaldrich.com/catalog/product/sigma/duo90806?lang=en&amp;region=AU</a>                                                                                               |           |
| Imaris                                          | <a href="http://www.bitplane.com/imaris/imaris">http://www.bitplane.com/imaris/imaris</a>                                                                                                                                                                                     |           |

**Supplementary Table 2.** Recommended size exclusion parameters for different magnification.

| <b>Magnification</b> | <b>Lower Size Exclusion<br/>(pixel size)</b> | <b>Upper Size Exclusion<br/>(pixel size)</b> |
|----------------------|----------------------------------------------|----------------------------------------------|
| 10x                  | 40                                           | infinity                                     |
| 20x                  | 100                                          | infinity                                     |
| 40x                  | 150                                          | infinity                                     |

**Supplementary Table 3.** Glossary defining the output parameters in the summary spreadsheet for the DAB+ IHC, PLA, H&E and 3D colony forming assay pipelines.

**IHC Glossary**

|                        |                                                                                                                                                        |
|------------------------|--------------------------------------------------------------------------------------------------------------------------------------------------------|
| Average Intensity      | The average mean grey value of all positive ROI, that ranges from 0-255 where 0 is darkest (black) and 255 is brightest (white).                       |
| Percent Area           | Percentage DAB positive area relative to the total area measured (Area of positive selection divided by area of total selection multiplied by 100)     |
| Percent Count          | Percentage DAB positive count relative to the total count measured (Count of positive selection divided by count of total selection multiplied by 100) |
| Positive Area          | The area of the DAB positive selection (positive ROI), which can be visualized in the "positive selection mask" image                                  |
| Positive Count         | The count of the DAB positive selection (positive ROI), which can be identified in the "positive ROI" zip file                                         |
| Positive Mask Image    | Black and white binary image where the positive count and area is measured from                                                                        |
| Positive Overlay Image | Pseudo-color image with the positive ROI overlaid on top of the raw image                                                                              |
| ROI                    | Region of Interest                                                                                                                                     |
| Total Area             | The area of the total selection (total ROI), which can be visualized in the "total selection mask" image                                               |
| Total Count            | The count of the total selection (total ROI), which can be identified in the "total ROI" zip file                                                      |
| Total Mask Image       | Black and white binary image where the total count and area is measured from                                                                           |
| Total Overlay Image    | Pseudo-color image with the total ROI overlaid on top of the raw image                                                                                 |

**PLA Glossary**

|                              |                                                                                                                       |
|------------------------------|-----------------------------------------------------------------------------------------------------------------------|
| Average Cytoplasmic Area     | The average area of each cytoplasm based on the number of nuclei identified (cytoplasm area divided by nucleus count) |
| Average Nuclei Area          | Average area of each nuclei (total nuclei area divided by nucleus count)                                              |
| Average Signal per Cytoplasm | Average foci in each cytoplasmic region (cytoplasmic signal divided by nucleus count)                                 |
| Average Signal per Nucleus   | Average foci in each nucleus (nuclear signal divided by nucleus count)                                                |
| Cytoplasm Area               | The total area of all cytoplasmic region measured from the "cytoplasm mask" image                                     |
| Cytoplasm Mask               | Black and white binary image where the total cytoplasmic area is measured from                                        |

|                            |                                                                                                                          |
|----------------------------|--------------------------------------------------------------------------------------------------------------------------|
| Cytoplasm Overlay          | Pseudo-color image with the cytoplasmic ROI overlaid on top of the raw cytoplasm image                                   |
| Cytoplasmic Signal         | Total number of foci identified within cytoplasmic regions                                                               |
| Exctracellular Signal      | Total number of foci identified outside of both nuclear and cytoplasmic region (total signal minus intracellular signal) |
| Foci Overlay               | Pseudo-color image with the foci ROI overlaid on top of the raw foci image                                               |
| Intracellular Signal       | Total number of foci identified within either nuclear or cytoplasmic regions (nuclear signal plus cytoplasmic signal)    |
| Non Cytoplasmic Signal     | Total number of foci identified outside of cytoplasmic regions                                                           |
| NonNuclear Signal          | Total number of foci identified outside of all nuclei                                                                    |
| Nuclear Signal             | Total number of foci identified within all nuclei                                                                        |
| Nuclei Mask                | Black and white binary image where the total nuclei area and count is measured from                                      |
| Nuclei Overlay             | Pseudo-color image with the nuclear ROI overlaid on top of the raw nucleus image                                         |
| Nucleus Count              | Total number of nuclei identified in the image based on the "nuclei ROI" zip file                                        |
| Percent Cytoplasmic Signal | Percentage of total foci that are cytoplasmic (cytoplasmic signal divided by total signal multiplied by 100)             |
| Percent Nuclear Signal     | Percentage of total foci that are nuclear (nuclear signal divided by total signal multiplied by 100)                     |
| ROI                        | Region of Interest                                                                                                       |
| Total Nuclei Area          | Total area of all nuclei measured from the "nuclei mask" image                                                           |
| Total Signal               | Total number of foci identified, which can be identified in the "all foci ROI" zip file                                  |

### H&E Glossary

|                        |                                                                                                                                                                |
|------------------------|----------------------------------------------------------------------------------------------------------------------------------------------------------------|
| Percent Area           | Percentage hematoxylin positive area relative to the total area measured (Area of positive selection divided by area of total selection multiplied by 100)     |
| Percent Count          | Percentage hematoxylin positive count relative to the total count measured (Count of positive selection divided by count of total selection multiplied by 100) |
| Positive Area          | The area of the hematoxylin positive selection (positive ROI), which can be visualized in the "positive selection mask" image                                  |
| Positive Count         | The count of the hematoxylin positive selection (positive ROI), which can be identified in the "positive ROI" zip file                                         |
| Positive Mask Image    | Black and white binary image where the positive count and area is measured from                                                                                |
| Positive Overlay Image | Pseudo-color image with the positive ROI overlaid on top of the raw image                                                                                      |

|                     |                                                                                                          |
|---------------------|----------------------------------------------------------------------------------------------------------|
| ROI                 | Region of Interest                                                                                       |
| Total Area          | The area of the total selection (total ROI), which can be visualized in the "total selection mask" image |
| Total Count         | The count of the total selection (total ROI), which can be identified in the "total ROI" zip file        |
| Total Mask Image    | Black and white binary image where the total count and area is measured from                             |
| Total Overlay Image | Pseudo-color image with the total ROI overlaid on top of the raw image                                   |

### 3D Colony Assay Glossary

|                                 |                                                                                                                       |
|---------------------------------|-----------------------------------------------------------------------------------------------------------------------|
| Average Area Per Colony         | The average area of each colony (total area of all colony divided by colony counts)                                   |
| Average Aspect Ratio Per Colony | The average aspect ratio of each colony based on the major axis divided by the minor axis                             |
| Average Circularity Per Colony  | The average circularity of each colony that ranges from 0-1 where 1 is a perfect circle and 0 is an elongated polygon |
| Cell Mask                       | Black and white binary image where the total colony count and area is measured from                                   |
| Cell Overlay                    | Pseudo-color image with the total ROI overlaid on top of the raw image                                                |
| Colony Counts                   | The count of total number of colonies, which can be identified in the "cells ROI" zip file                            |
| ROI                             | Region of Interest                                                                                                    |
| Total Area of All Colony        | The area of the total selection, measured based on the "cell masks" image                                             |



**Supplementary Table 4.** Optimized parameters used in the analysis of DAB+ IHC lung metastasis

**IHC Model 1 Analysis Parameters**

| <b>IHC Optimization</b>              | <b>Optimization</b> |
|--------------------------------------|---------------------|
| Total Selection                      | Enhanced            |
| Positive Selection                   | Basic               |
| Threshold                            | Manual              |
| Total Gaussian Blur                  | 0                   |
| Total Lower Threshold                | 0                   |
| Total Upper Threshold                | 190                 |
| Total Lower Size Exclusion           | 50                  |
| Total Upper Size Exclusion           | infinity            |
| Total Lower Circularity Exclusion    | 0                   |
| Total Upper Circularity Exclusion    | 1                   |
| Total Watershed                      | FALSE               |
| Total Exclusion                      | FALSE               |
| Positive Gaussian Blur               | 3                   |
| Positive Lower Threshold             | 0                   |
| Positive Upper Threshold             | 120                 |
| Positive Lower Size Exclusion        | 200                 |
| Positive Upper Size Exclusion        | infinity            |
| Positive Lower Circularity Exclusion | 0                   |
| Positive Upper Circularity Exclusion | 1                   |
| Positive Watershed                   | FALSE               |
| Positive Exclusion                   | FALSE               |

**IHC Model 2 Analysis Parameters**

| <b>IHC Optimization</b>              | <b>Optimization</b> |
|--------------------------------------|---------------------|
| Total Selection                      | Enhanced            |
| Positive Selection                   | Basic               |
| Threshold                            | Manual              |
| Total Gaussian Blur                  | 0                   |
| Total Lower Threshold                | 0                   |
| Total Upper Threshold                | 210                 |
| Total Lower Size Exclusion           | 50                  |
| Total Upper Size Exclusion           | infinity            |
| Total Lower Circularity Exclusion    | 0                   |
| Total Upper Circularity Exclusion    | 1                   |
| Total Watershed                      | FALSE               |
| Total Exclusion                      | FALSE               |
| Positive Gaussian Blur               | 3                   |
| Positive Lower Threshold             | 0                   |
| Positive Upper Threshold             | 185                 |
| Positive Lower Size Exclusion        | 200                 |
| Positive Upper Size Exclusion        | infinity            |
| Positive Lower Circularity Exclusion | 0                   |
| Positive Upper Circularity Exclusion | 1                   |
| Positive Watershed                   | FALSE               |
| Positive Exclusion                   | FALSE               |

**IHC Images Corrected For Background**

| <b>IHC Optimization</b>              | <b>Optimization</b> |
|--------------------------------------|---------------------|
| Total Selection                      | Enhanced            |
| Positive Selection                   | Basic               |
| Threshold                            | Manual              |
| Total Gaussian Blur                  | 0                   |
| Total Lower Threshold                | 0                   |
| Total Upper Threshold                | 175                 |
| Total Lower Size Exclusion           | 150                 |
| Total Upper Size Exclusion           | infinity            |
| Total Lower Circularity Exclusion    | 0                   |
| Total Upper Circularity Exclusion    | 1                   |
| Total Watershed                      | FALSE               |
| Total Exclusion                      | FALSE               |
| Positive Gaussian Blur               | 0                   |
| Positive Lower Threshold             | 0                   |
| Positive Upper Threshold             | 90                  |
| Positive Lower Size Exclusion        | 200                 |
| Positive Upper Size Exclusion        | infinity            |
| Positive Lower Circularity Exclusion | 0                   |
| Positive Upper Circularity Exclusion | 1                   |
| Positive Watershed                   | FALSE               |
| Positive Exclusion                   | FALSE               |

## Supplementary Information

**Supplementary Table 5.** Optimized parameters used in the analysis of in the analysis of TMA series.

| <b>IHC Optimization</b>                      | <b>Optimization</b> |
|----------------------------------------------|---------------------|
| Total Selection                              | Enhanced            |
| Positive Selection                           | Enhanced            |
| Threshold                                    | Manual              |
| Average Total Gaussian Blur                  | 2                   |
| Average Total Lower Threshold                | 0                   |
| Average Total Upper Threshold                | 130                 |
| Average Total Lower Size Exclusion           | 100                 |
| Average Total Upper Size Exclusion           | infinity            |
| Average Total Lower Circularity Exclusion    | 0                   |
| Average Total Upper Circularity Exclusion    | 1                   |
| Total Watershed                              | FALSE               |
| Total Edge Exclusion                         | FALSE               |
| Total Fill Holes                             | FALSE               |
| Average Positive Gaussian Blur               | 2                   |
| Average Positive Lower Threshold             | 0                   |
| Average Positive Upper Threshold             | 125                 |
| Average Positive Lower Size Exclusion        | 100                 |
| Average Positive Upper Size Exclusion        | infinity            |
| Average Positive Lower Circularity Exclusion | 0                   |
| Average Positive Upper Circularity Exclusion | 1                   |
| Positive Watershed                           | FALSE               |
| Positive Edge Exclusion                      | FALSE               |
| Positive Fill Holes                          | FALSE               |

## Supplementary Information

**Supplementary Table 6.** Optimized parameters used in the analysis of in the analysis of PLA series.

| <b>PLA Optimization</b>               | <b>Optimization</b> |
|---------------------------------------|---------------------|
| Nuclei Unique Name                    | Nuc                 |
| Foci Unique Name                      | Foci                |
| Cytoplasm Unique Name                 | Cyto                |
| Threshold                             | Automatic           |
| Nucleus Bright Radius                 | 5                   |
| Nucleus Bright Threshold              | 50                  |
| Nucleus Dark Radius                   | 5                   |
| Nucleus Dark Threshold                | 50                  |
| Nucleus Gaussian Blur                 | 2                   |
| Nucleus Lower Threshold               | Auto=Huang          |
| Nucleus Upper Threshold               | NaN                 |
| Nucleus Lower Size Exclusion          | 5000                |
| Nucleus Upper Size Exclusion          | infinity            |
| Nucleus Lower Circularity Exclusion   | 0                   |
| Nucleus Upper Circularity Exclusion   | 1                   |
| Nucleus Watershed                     | FALSE               |
| Nucleus Exclude                       | FALSE               |
| Foci Maxima Value                     | 4                   |
| Cytoplasm Bright Radius               | 0                   |
| Cytoplasm Bright Threshold            | 0                   |
| Cytoplasm Dark Radius                 | 0                   |
| Cytoplasm Dark Threshold              | 0                   |
| Cytoplasm Gaussian Blur               | 2                   |
| Cytoplasm Lower Threshold             | Auto=Huang          |
| Cytoplasm Upper Threshold             | NaN                 |
| Cytoplasm Lower Size Exclusion        | 5000                |
| Cytoplasm Upper Size Exclusion        | infinity            |
| Cytoplasm Lower Circularity Exclusion | 0                   |
| Cytoplasm Upper Circularity Exclusion | 1                   |
| Cytoplasm Watershed                   | FALSE               |
| Cytoplasm Exclude                     | FALSE               |

## Supplementary Information

### Supplementary References

- 1 Schneider, C. A., Rasband, W. S. & Eliceiri, K. W. NIH Image to ImageJ: 25 years of image analysis. *Nat Methods* **9**, 671-675 (2012).
- 2 Schindelin, J. *et al.* Fiji: an open-source platform for biological-image analysis. *Nat Methods* **9**, 676-682, doi:10.1038/nmeth.2019 (2012).
- 3 Tuominen, V. J., Ruotoistenmaki, S., Viitanen, A., Jumppanen, M. & Isola, J. ImmunoRatio: a publicly available web application for quantitative image analysis of estrogen receptor (ER), progesterone receptor (PR), and Ki-67. *Breast Cancer Res* **12**, R56, doi:10.1186/bcr2615 (2010).
- 4 Carpenter, A. E. *et al.* CellProfiler: image analysis software for identifying and quantifying cell phenotypes. *Genome Biol* **7**, R100, doi:10.1186/gb-2006-7-10-r100 (2006).
- 5 Sommer, C., Strähle, C., Köthe, U. & Hamprecht, F. A. in *Eighth IEEE International Symposium on Biomedical Imaging (ISBI)* 230-233 (2011).
- 6 de Chaumont, F. *et al.* Icy: an open bioimage informatics platform for extended reproducible research. *Nat Methods*. **9**, 690-696. doi: 610.1038/nmeth.2075. (2012).
- 7 Daims, H., Lucker, S. & Wagner, M. daime, a novel image analysis program for microbial ecology and biofilm research. *Environ Microbiol.* **8**, 200-213. (2006).
- 8 Allalou, A. & Wahlby, C. BlobFinder, a tool for fluorescence microscopy image cytometry. *Comput Methods Programs Biomed.* **94**, 58-65. doi: 10.1016/j.cmpb.2008.1008.1006. Epub 2008 Oct 1023. (2009).

# Supplementary Information

## Supplementary Figures

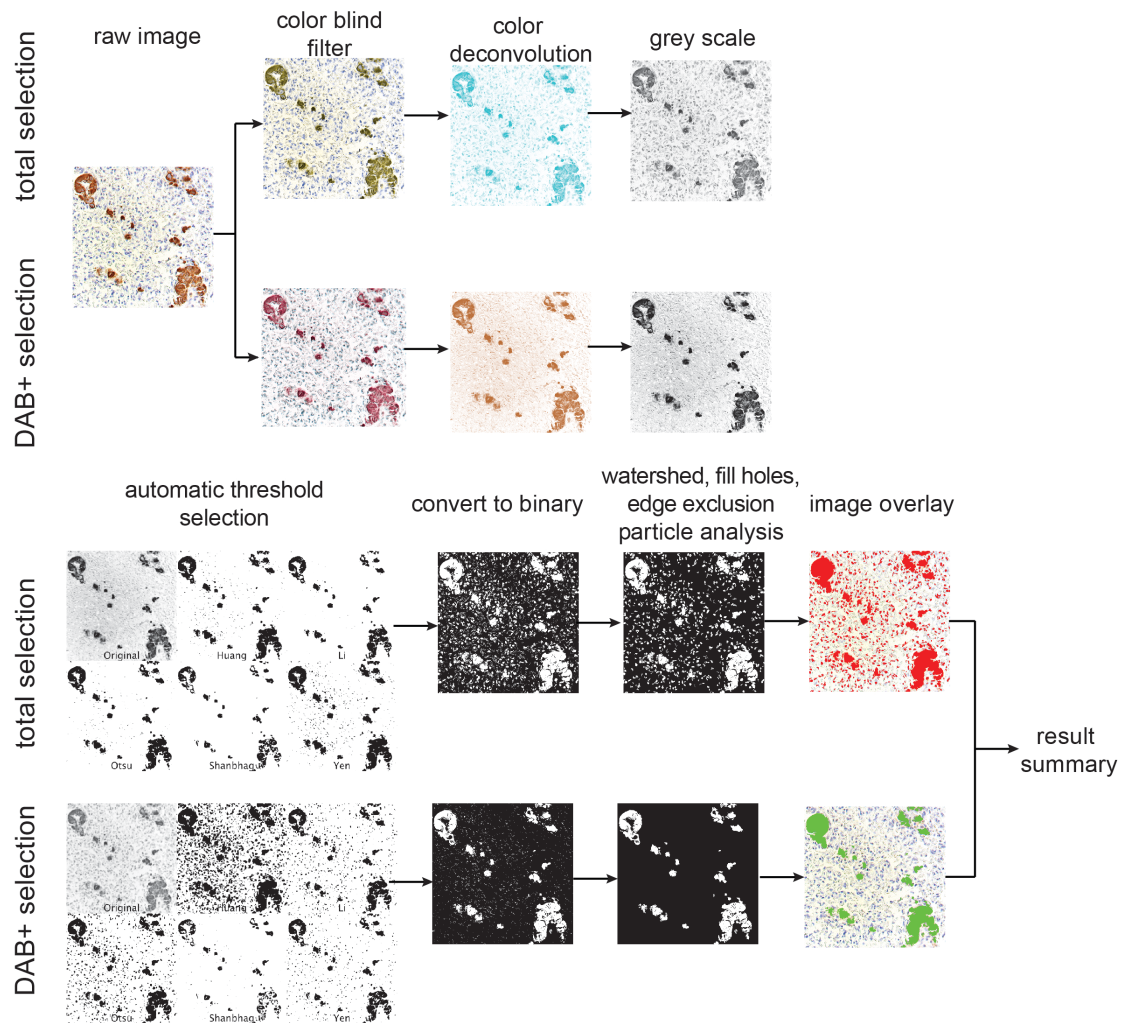

Law *et al* Supplementary figure 1

# Supplementary Information

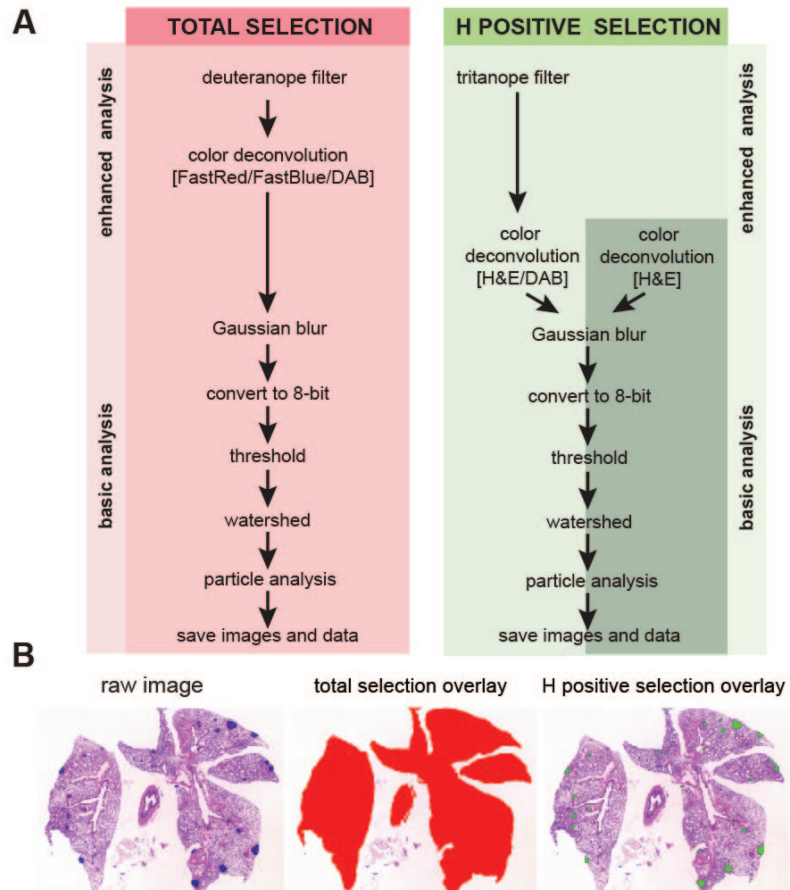

Law *et al* Supplementary Figure 2

## Supplementary Information

A

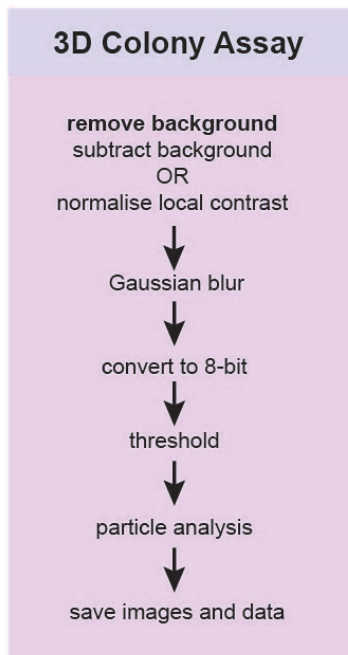

B

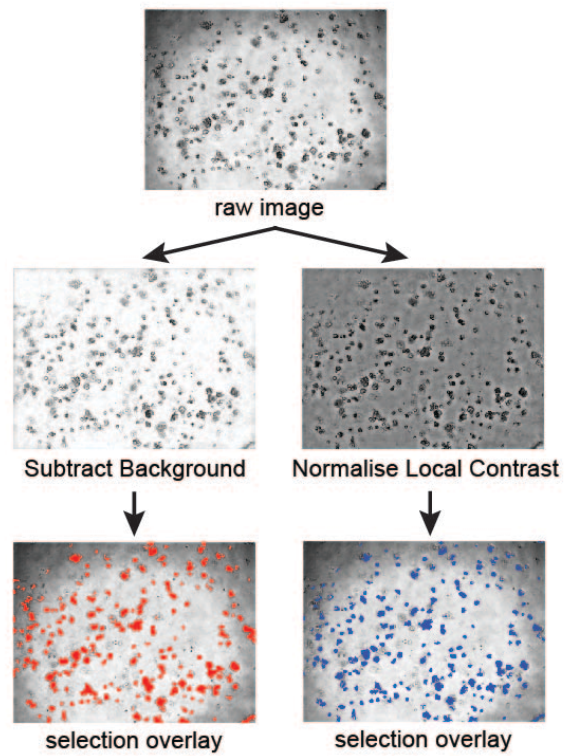

Law *et al* Supplementary figure 3

## Supplementary Information

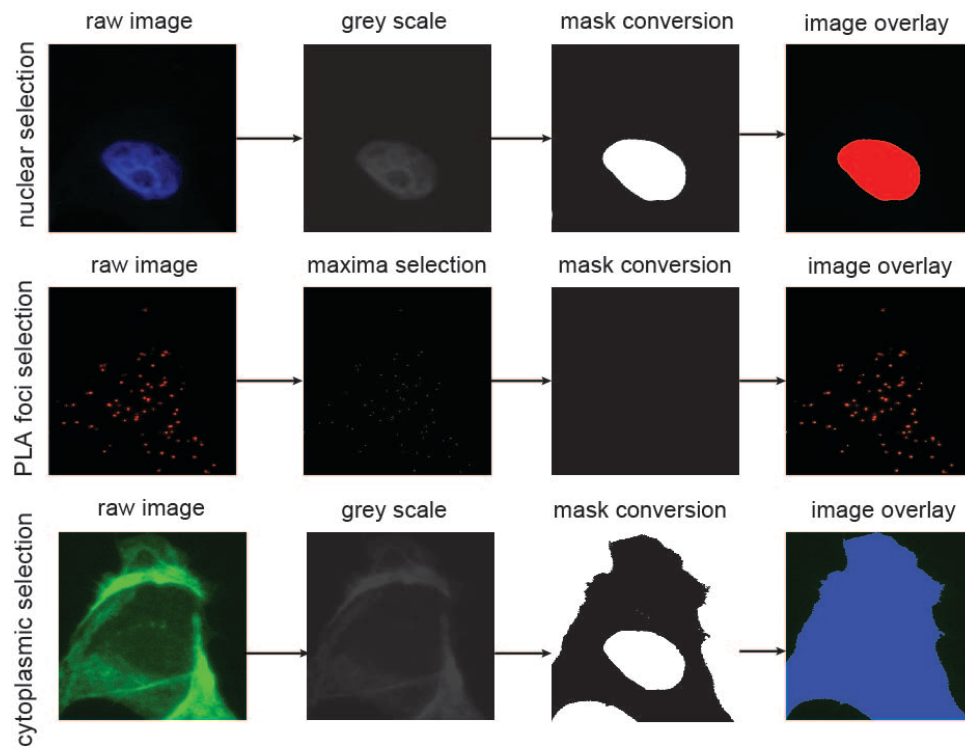

Law *et al* Supplementary figure 4
